# Supplementary material for: Super-regular femtosecond laser nanolithography based on dual-interface plasmons coupling
Source: publisher site journal article supplement (doi:10.1515/nanoph-2021-0329), 2021-09-25
Supplement: Supplementary file 1 [file j_nanoph-2021-0329_suppl.docx]

**Supplementary Information for**

**Super-regular femtosecond laser nanolithography based on dual-interface plasmons coupling**

Hongbo Xie, 1,2 Bo Zhao, 3 Jinluo Cheng, 1 Sandeep Kumar Chamoli, 1,2 Yuhao Lei, 1 Tingting Zou,1,2 Wei Xin, 1 and Jianjun Yang1,*

1GPL Photonics Laboratory, State Key Laboratory of Applied Optics, Changchun Institute of Optics, Fine Mechanics and Physics, Chinese Academy of Sciences, Changchun 130033, China

2University of Chinese Academy of Sciences, Beijing 100049, China

3Department of Electronic Information and Physics, Changzhi University, Shanxi 046011, China

*E-mail: [jjyang@ciomp.ac.cn](mailto:jjyang@ciomp.ac.cn)

**S1. Influence of laser polarization on the nanograting formation**

We studied the influence of the laser polarization on the formation of nanograting structures. Figure S1 presents SEM images of nanograting structures produced by the femtosecond laser with different polarization directions, in which the laser line-scanning is always kept in the horizontal direction. It is found that the grating orientation is always perpendicular to the laser polarization, which indicates a route for the optical control of the structure formation.


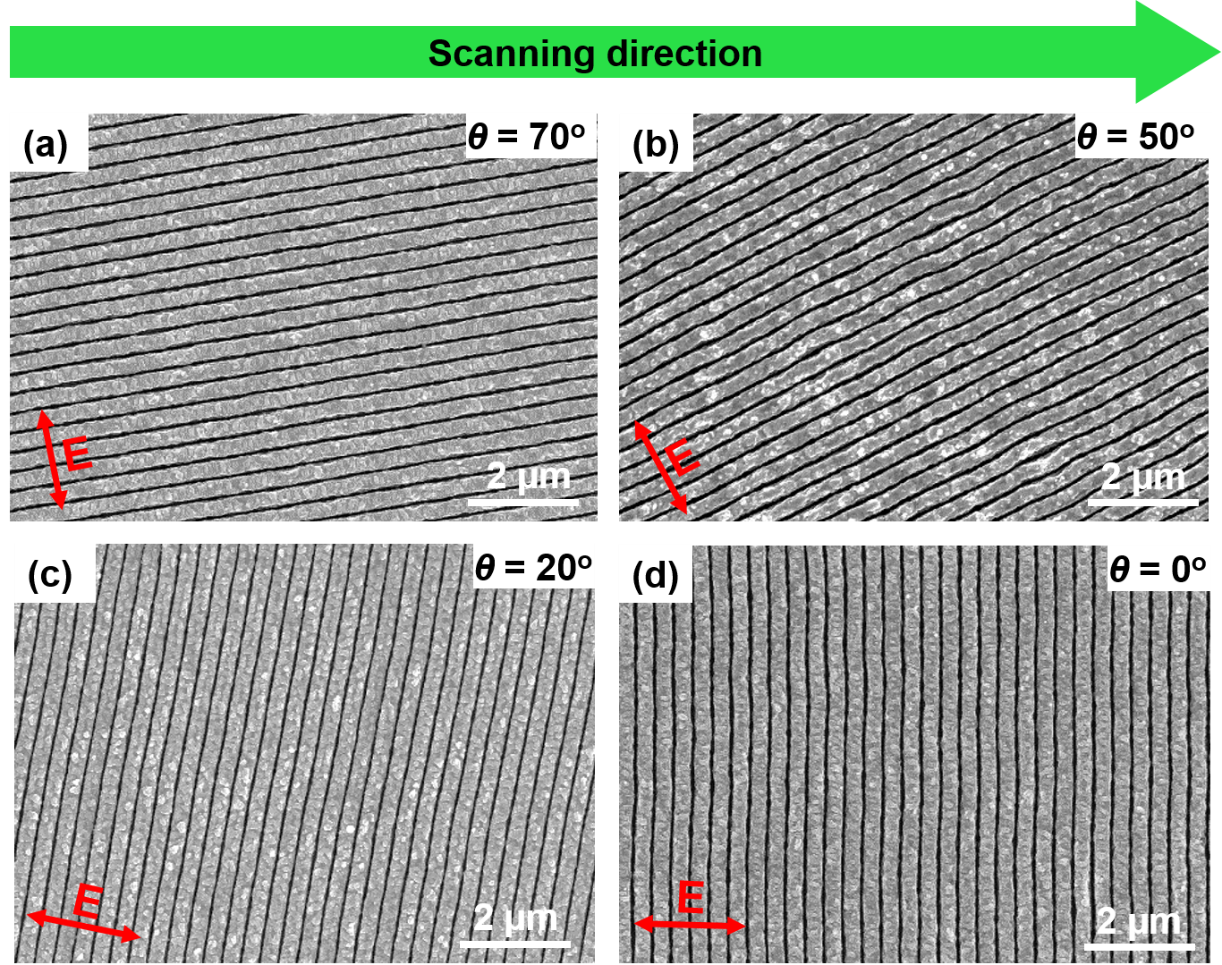


**Figure S1** SEM images of the obtained nanograting structures when varying the direction the laser polarization relative to a fixed line-scanning, the angle between which is respectively given by (a)70o, (b)50o, (c)20o and (d)0o. Here, *E* represents the direction of the laser polarization.

**S2. Characterizations of the long-range spatial uniformity**

Figure S2 shows the measured fractional changes of the structural period for 60 consecutive ablative grooves within the laser-exposed areas. The obtained Δ*Λ/Λ* are lessthan0.05, which denotes a long-range spatial uniformity for the nanograting structures fabricated by our femtosecond laser lithography.


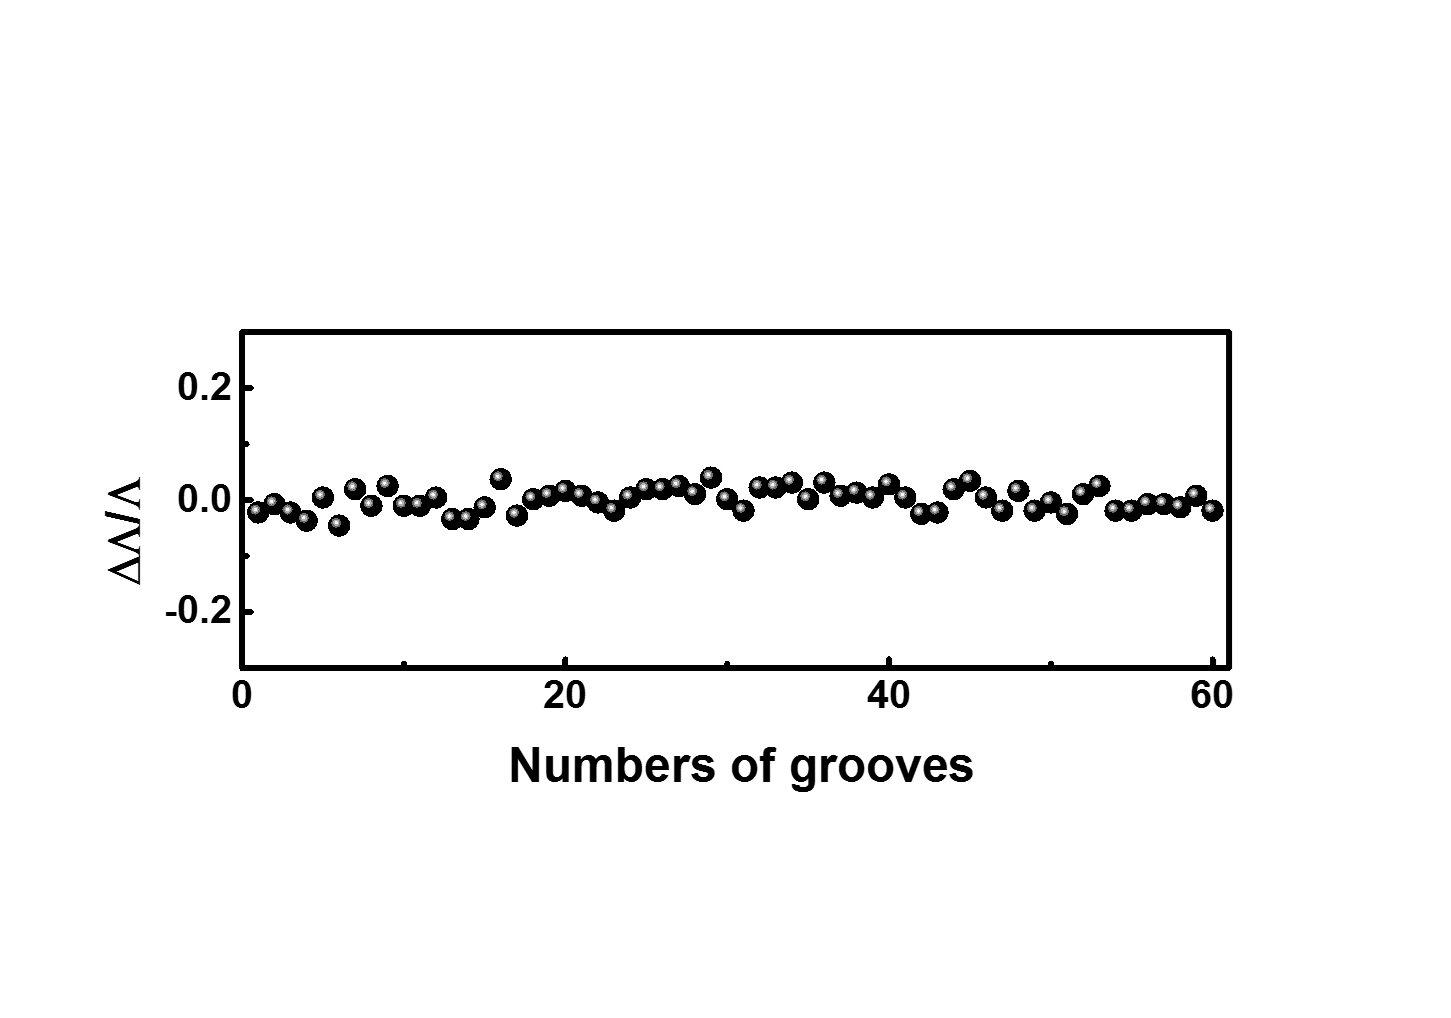


**Figure S2** Statistical fractional variations of the structural period for 60 consecutive groove structures.

**S3. Influences of laser fluence and scanning velocity on the nanograting formation**

Generally speaking, the stability is critical for the practical implementation of laser nanomachining techniques. Here, we investigate the effects of the laser parameters (i.e., the laser fluence and scanning velocity) on the formation of nanograting structures. Figures S3a-b illustrate the variations of the ablated structure period and width against the scanning velocity and the incident laser fluence, respectively. It is clear that the measured period and width almost remain constant with values of *Λ* = 355 nm and *W* = 85 nm, respectively, with varying the scanning velocity and laser fluence. The independence of the structure features on both the scanning velocity and the incident laser fluence indicates the stability of our proposed laser processing technique.

**
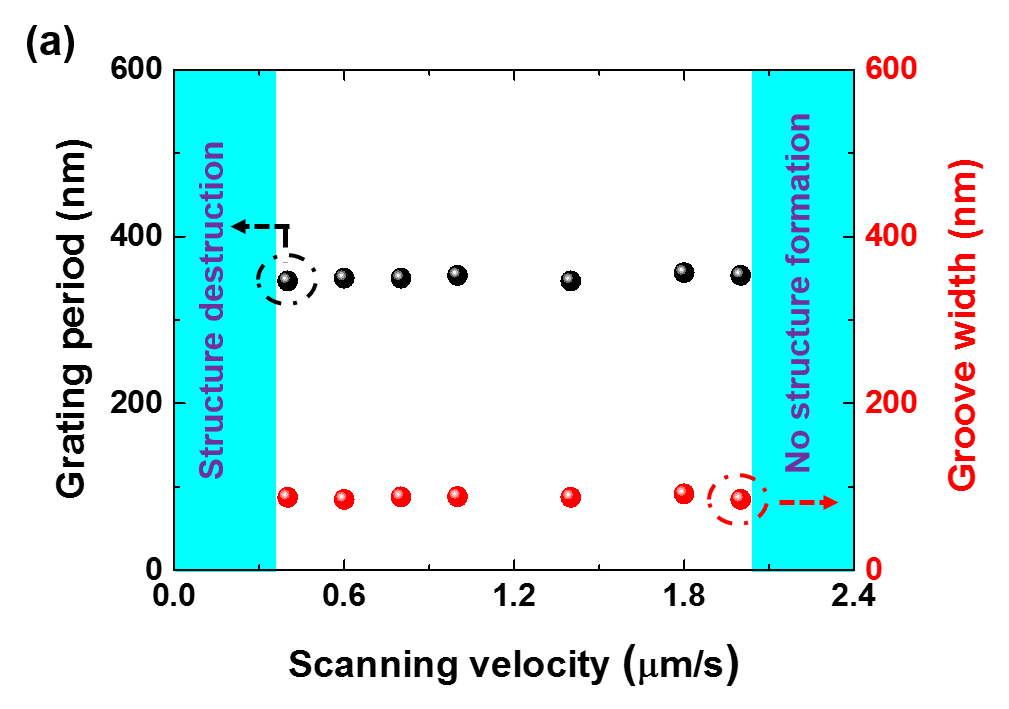
**

**
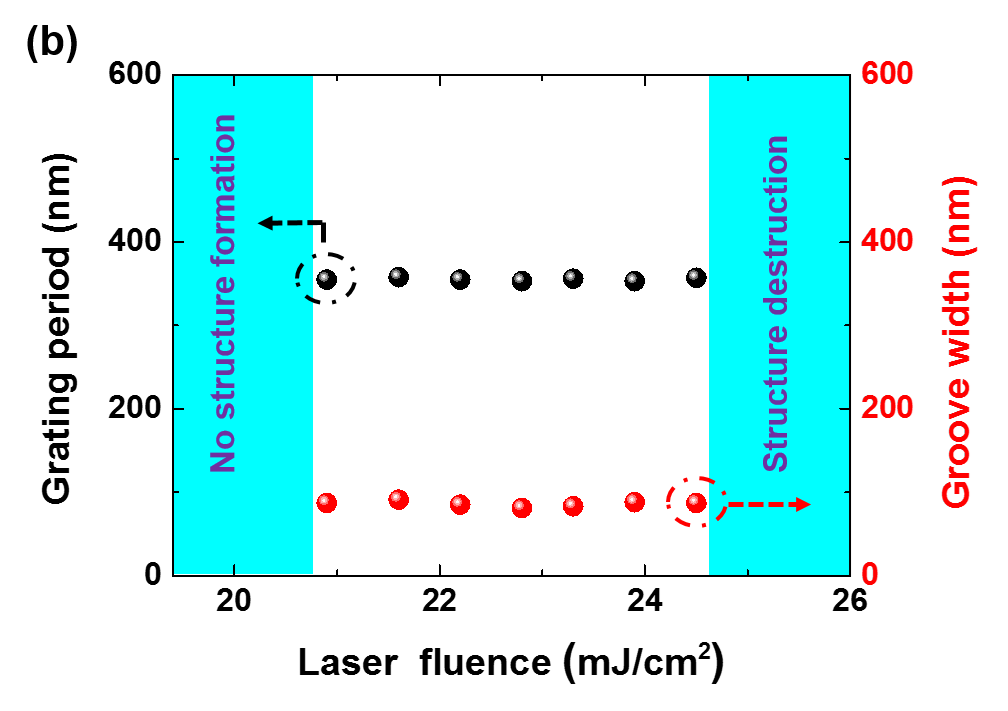
**

**Figure S3** Measured period (black circles) and width (red circles) of the ablated nanograting structures as a function of the laser parameters. (a) Change of the scanning velocity at the fixed laser fluence of *F* = 22.5 mJ/cm2. (b) Change of the incident laser fluence at the fixed scanning velocity of *V* = 2 µm/s.

**S4. Extensibility of the nanograting structures on other substrate materials**

In our experiments, the regular formation of the ablative nanograting structures can also be achieved when the substrate material is changed. As presented in Figure S4, the surface structures formed on Si (110) or GaAs substrate coated with 25 nm thick Cr film exhibit the highly regular distributions and deep-subwavelength periods, which is very similar to the observation on the material of 25 nm thick Cr/Si (100).

**
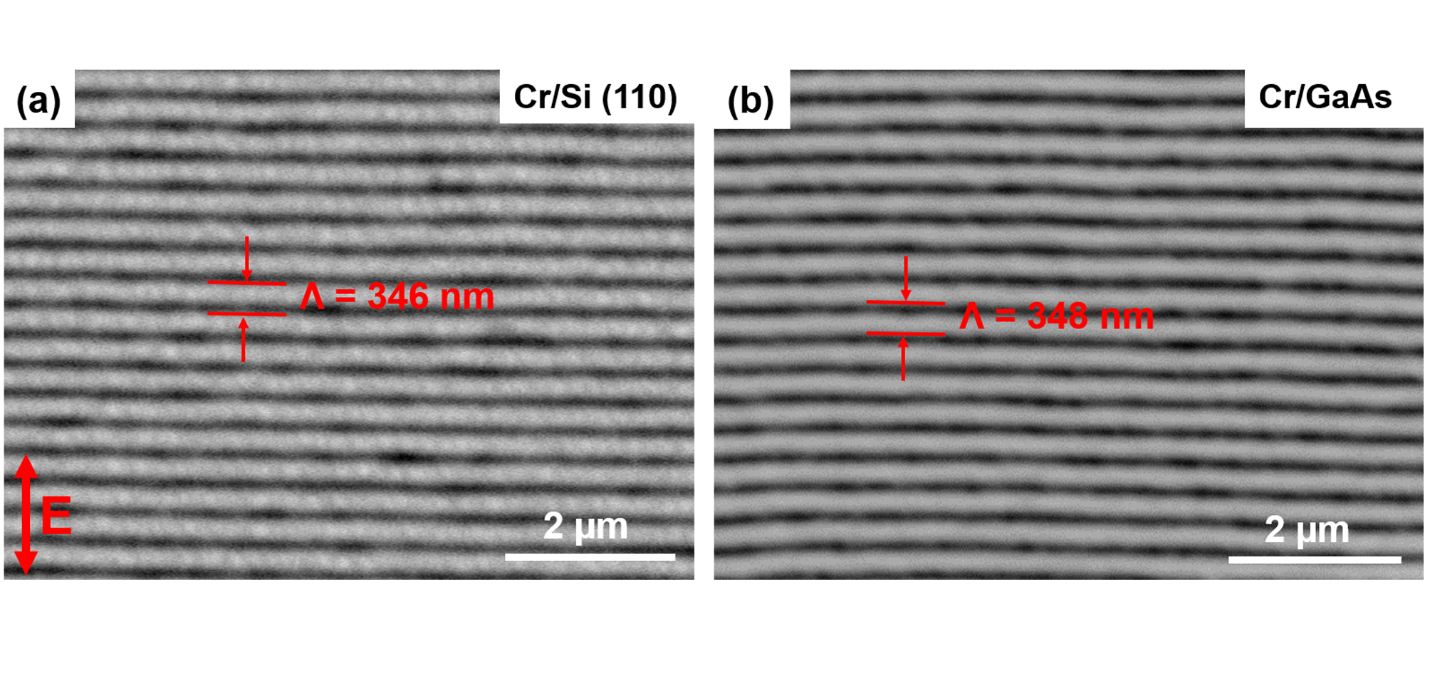
**

**Figure S4** Formation of the ablative nanograting structures on other substrates covered with 25 nm thick Cr film: (a) Si (110), (b) GaAs.

**S5. Excitation of dual-interface coupled SPPs in thin Cr films**

Normally, for bulk metallic materials, the SPP mode can be excited on a dielectric-metal interface when its phase matches with the incident light, as shown by a diagram in Figure. S5a{Barnes, 2003 #77}. In this case, a dispersion relation of the excited SPP mode on this single interface is determined by{Barnes, 2003 #77}{Barnes, 2003 #77}1:

, (S1)

where *β*sand *k*0 are the wave vectors of the excited SPP and the free-space light, respectively. *εm* and*εd* respectively represent the permittivity of the metal and the dielectric. Figure S5b shows the calculated SPP wavelengths on the interface of vacuum and metal following the irradiation of 800 nm incident light, where the real part *Re*(*εm*) and the image part *Im*(*εm*) of the metal permittivity are varied within a range of -1.5 to -10 and 0 to 30, respectively. It shows that the wavelength of excited SPP on the bulk Cr metal is 799 nm, even larger than the twice measured structure period on 25 nm thick Cr/Si sample material.

**
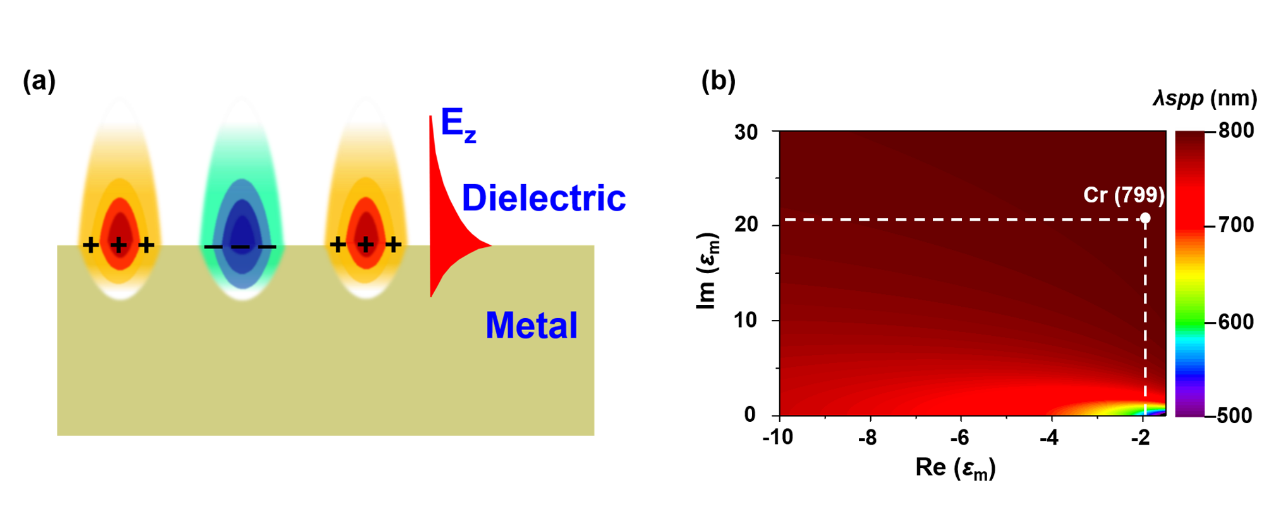
Figure S5** (a) Schematic diagrams of single-interface SPP excitation for the bulk metal. (b) Calculated SPP wavelengths on the single interface of vacuum and bulk metals as a function of the metal permittivity.

To explore the formation mechanism of the peculiar nanograting structures in our experiment, a dual-interface coupled SPP model is proposed and the corresponding schematic diagram is presented in Figure S6a. Here, by symbolizing the thickness of Cr metal film as *t*, and the dielectric constants of three different media (vacuum, Cr film and Si substrate) as *ε1, εcr,* *ε3*, respectively, we obtain the dispersion relations of the coupled SPP mode as follows2:

,

,

,

. (S2)

where *β*h is the propagation constant of the coupled SPP mode. The wavelength of dual-interface coupled SPPs is given by, which equates to the spatial period of the laser-induced surface structures. The penetration depth of the coupled SPP mode within Cr metal film is expressed as

By solving the above dispersion relations with the parameters of *ε1* = 1*, εcr* = -1.98 + *i**21.88*, ε3* = 13.65, we can obtain two non-radiative solutions that are referred as hybrid SPP-1 and hybrid SPP-2. Figure S6b shows the dependence of the normalized real and image parts of the wave vectors, *β'/k0* and *β"/k0*, on the Cr film thickness for both the hybrid SPP-1 and hybrid SPP-2 modes. As a matter of fact, when 50 nm thick Cr/Si material was irradiated with 8000 laser pulses at an laser fluence of *F* = 25.9 mJ/cm2 under *P* = 2.0 × 10-5 Pa condition, we can observe the formation of two types of surface structures: one is featured by a strong ablation with a small period of *Λ1* = 323 nm; the other is characterized by nanoparticle arrays with a large period of *Λ2* = 797 nm, as shown in Figure S6c. These structural periods almost coincides with the predicted periods of 251 nm and 810 nm for the hybrid SPP-1 and hybrid SPP-2. Furthermore, similar observations were also captured on the surface of 25 nm thick Cr/GaAs sample, as shown in Figure S6d.

**
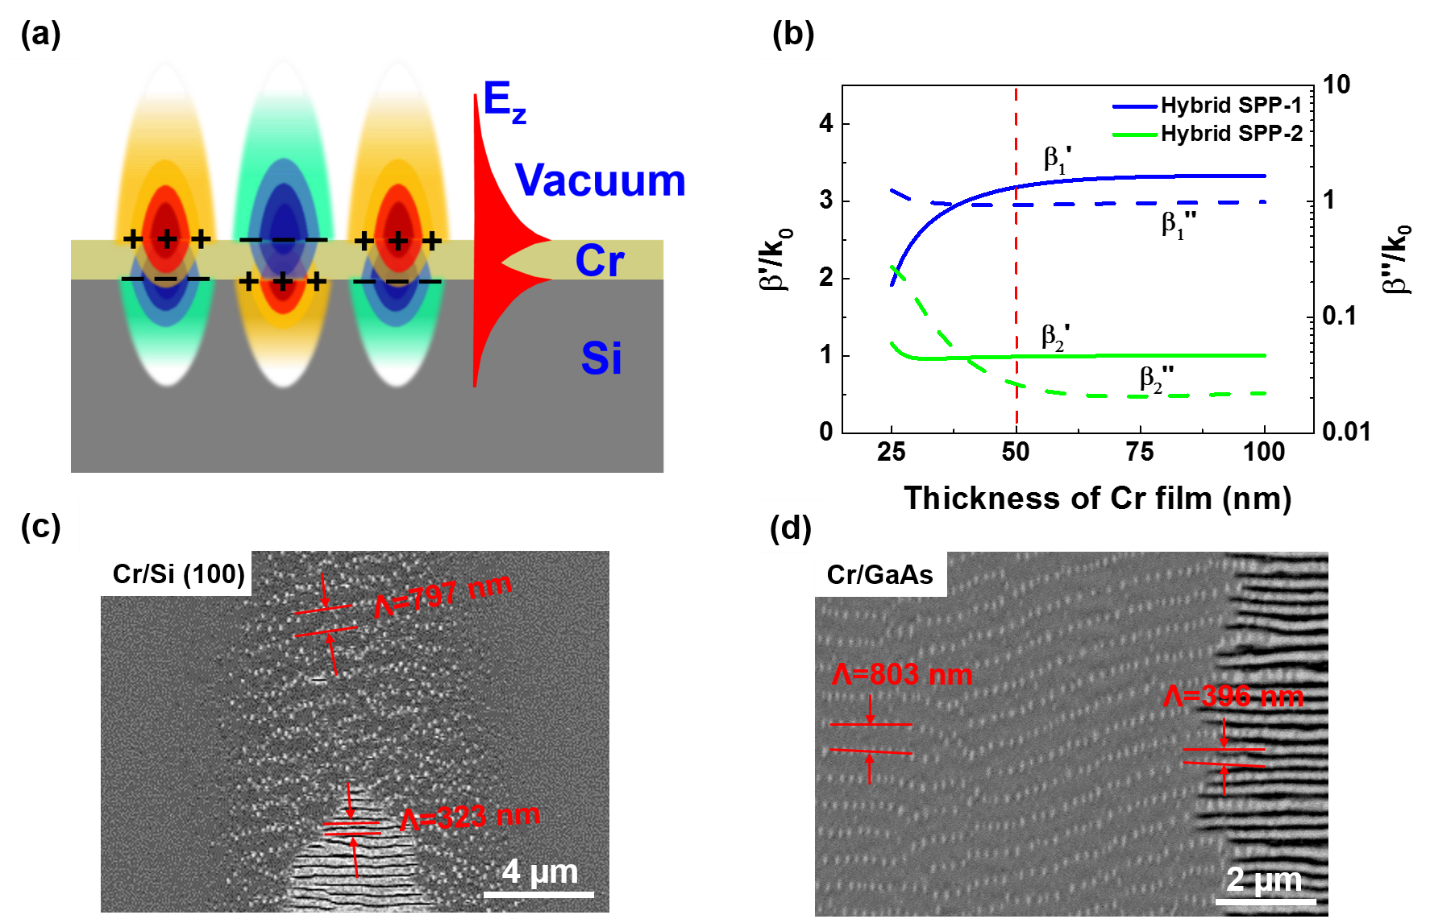
**

**Figure S6** (a) Schematic diagrams of dual-interface coupled SPP excitation for thin Cr/Si system. (b) Calculated values of *β'*/*k*0 and *β"*/*k*0 for two non-radiative dual-interface coupled SPP modes versus the thickness of Cr metal film. Experimental observations for two types of surface structures on different sample materials: (c) 50 nm thick Cr/Si (100) and (d) 25 nm thick Cr/GaAs.

**S6. Influence of ultrafast dynamics of materials on the excitation of hybrid SPPs**

It is known that, when metals and semiconductors are irradiated by femtosecond laser pulses, the ultrafast dynamics with nonequilibrium electron distributions can be excited, during which the optical property of materials can be transiently modulated3,4. Therefore, the influences of transient optical property for both Cr and Si materials on the SPPs excitation should be considered here. As for the bulk Cr material, the experimentally measured period (*Λbulk* = 765 ± 29 nm) of LIPSSs is found to nearly coincide with the calculated single-interface SPP wavelength (799 nm) using the static optical constants. This small deviation indicates that the transient change of optical property for the Cr material is not evident under such laser irradiation, which can be in fact neglected in our experiments.

Additionally, the influence of optically-excited Si on the generation of hybrid SPPs is also considered. The permittivity of the optically-excited Si can be calculated as follows4:

(S3)

where *N0* is the valance-band electron density; *Ne* being excited plasma density; *ω* for the laser frequency; and *τD* for the Drude damping time. The plasma frequency is determined by, where *e* is the electron charge, *ε0* is the vacuum permittivity, and *m** is the effective electron mass. Figure S7a shows the real and image parts of permittivity for the optically- excited Si as a function of the excited plasma density. Based on this relation, the wavelengths of hybrid SPP-1 for different thicknesses of Cr films can be calculated at different optically-excited Si plasma densities, as shown in Figure S7b, where the plasma density value is ranging from 1.0 × 1020-1.5 × 1021 cm-3 due to the weak laser irradiation in our experiments. The slow variations of the hybrid SPP-1 wavelength with the increasing plasma density can be seen for these three cases, which indicates that the transient change of the Si optical property is also not significant. Therefore, to a certain extent, the influence of ultrafast dynamics for Cr and Si materials on the excitation of hybrid SPPs can be ignored in our experiments.

**
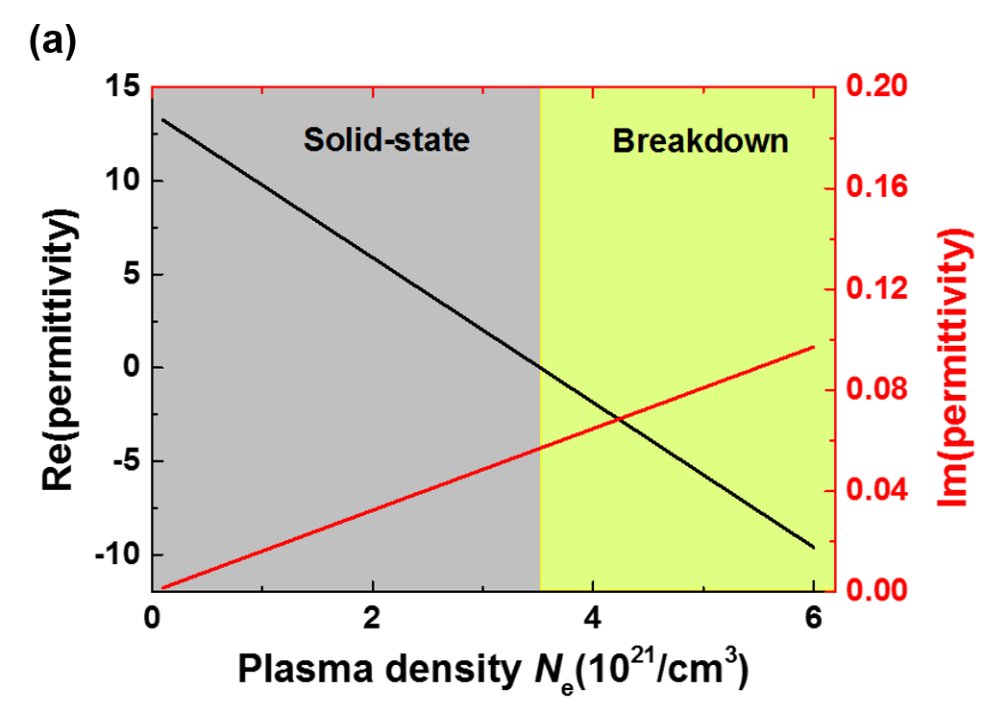
**

**
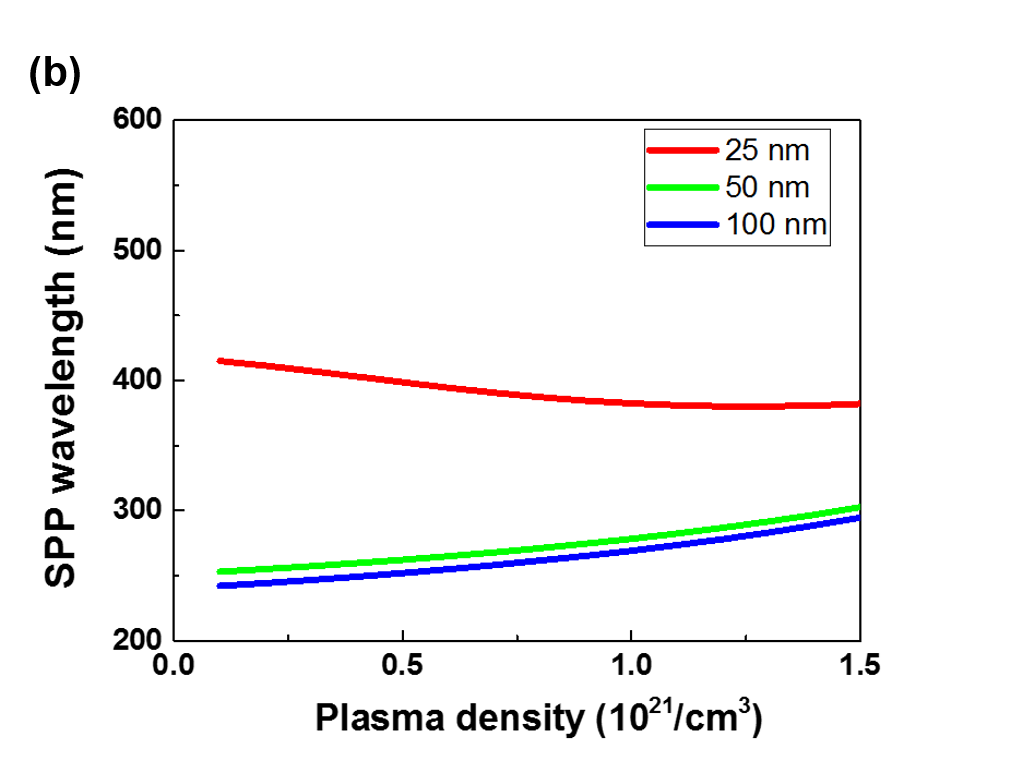
**

**Figure S7** (a) Calculated permittivity of the optically-excited Si material as a function of the plasma density. (b) Calculated wavelengths of hybrid SPP-1 excited in thin Cr films with different thicknesses as a function of the Si plasma density.

**S7. Wet etching assisted modification of Si nanograting structures**

Here, a wet etching approach was proposed to further reduce the surface roughness and modify the geometry of the structure units. During the etching experiments, the laser-structured Cr/Si samples were immersed into 41 wt.% KOH solution at 40 oC for different time, where only the exposed Si material inside the grooves was etched. Figure S8a shows the cross-sectional SEM images of the grating structures after etching for 1 min, 2 mins, 3mins and 5mins. As the etching time consumes, the cross section of the grooves was found to gradually turn into a narrow-mouthed V-type profile. In other words, the belly of the grooves was significantly broadened because of the anisotropic etching for different crystal planes of Si. Moreover, the measured variations for the structural width and depth versus the etching time are shown in Figure S8b, where the notable material removal occurs at 2-3 mins.

**
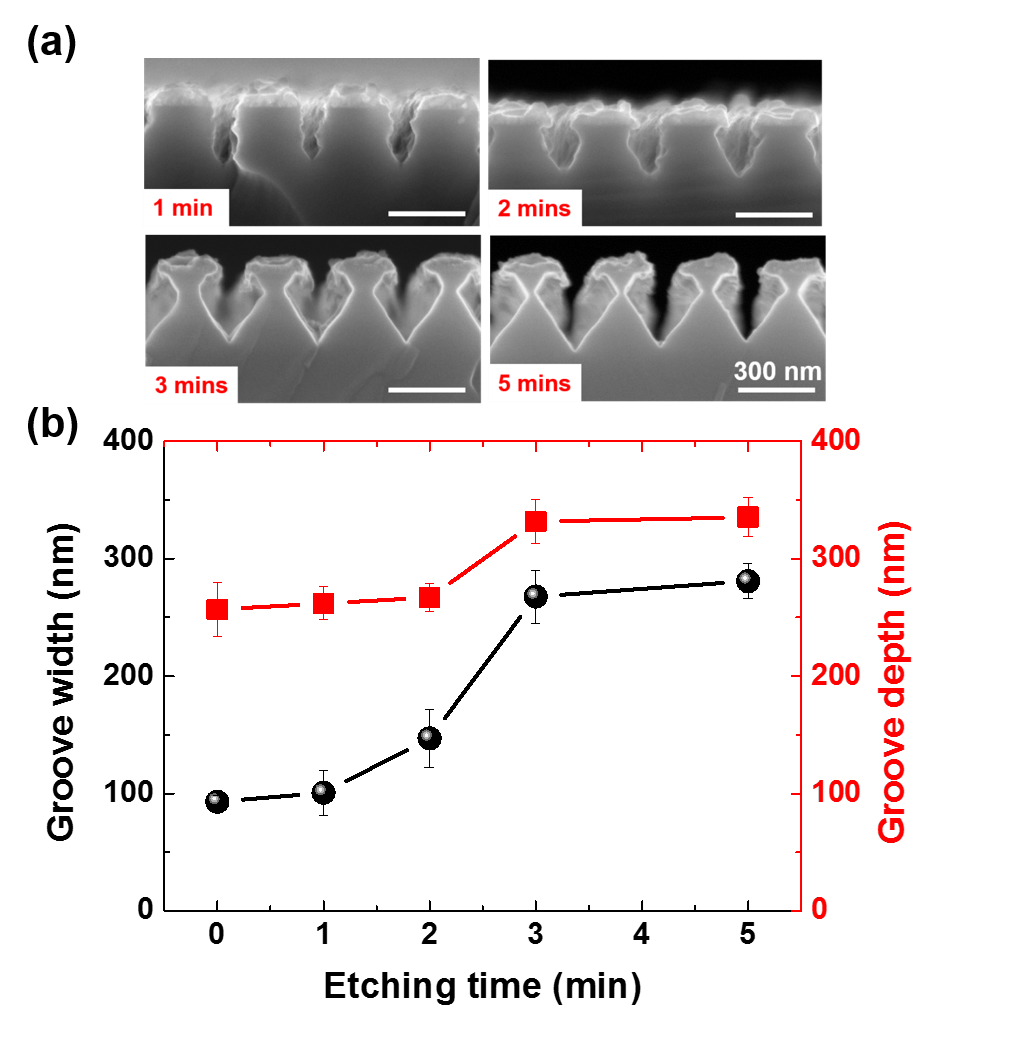
**

**Figure S8** (a) SEM images (side-view) of the nanograting structures after being etched in KOH solution for different time. (b) Measured variations of the width and depth for the groove unite as a function of the etching time.

**S8. Analysis of material compositions for nanograting structures**

Different from the formation of metal-oxide structures under air with normal pressure5, 6, we demonstrate the super-regular production of ablative nanograting structures on the thin Cr/Si material via femtosecond laser irradiation under high vacuum (*P* = 2.0 × 10-5 Pa) conditions. In order to verify the oxidation of Cr film can be effectively prohibited during the laser structuring, we characterized the material compositions in the laser-irradiation areas using a commercial Raman spectrometer (Horiba Jobin Yvon). As shown by the measured Raman spectra (Figure S9), signals of chromium oxides cannot be found within a spectrum range of 400-800 cm-1, except for a distinct peak at 520 cm-1 that is attributed to the silicon substrate7. A similar measurement result in the areas without laser irradiation is also obtained. Therefore, we can conclude that the oxidation process of Cr film can be effectively avoided during the formation of nanograting structures in this work.

**
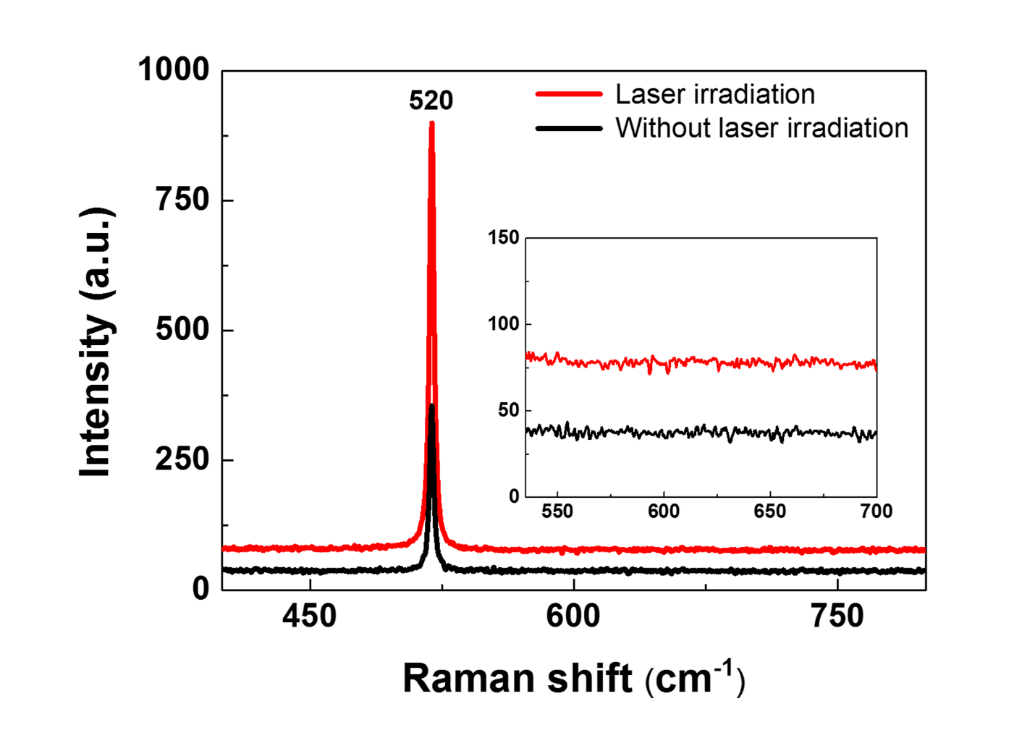
**

**Figure S9** Measured Raman spectra in the areas with and without laser irradiation for a 25 nm thick Cr/Si material. The insert shows the magnified Raman spectra in a range of 535-700 cm-1.

**References**

1. Barnes, W. L.; Alain, D.; Ebbesen, T. W. Surface plasmon subwavelength optics. *Nature* **2003**, *424*, 824-830.

2. Burke, J. J.; Stegeman, G. I.; Tamir, T. Surface-polariton-like waves guided by thin, lossy metal films. *Phys. Rev. B* **1986**, *33*, 5186-5201.

3. Del Fatti, N.; Bouffanais, R.; Vallee, F.; Flytzanis, C. Nonequilibrium electron interactions in metal films. *Phys. Rev. Lett.* **1998**, *81*, 922-925.

4. Sokolowski-Tinten, K.; Linde, D. v. d. Generation of dense electron-hole plasmas in silicon. *Phys. Rev. B* **2000**, *61*, 2643-2650.

5. Dostovalov, A. V.; Korolkov, V. P.; Okotrub, K. A.; Bronnikov, K. A.; Babin, S. A. Oxide composition and period variation of thermochemical LIPSS on chromium films with different thickness. *Opt. Express* **2018**, *26*, 7712.

6. Öktem, B.; Pavlov, I.; Ilday, S.; Kalaycıoğlu, H.; Rybak, A.; Yavaş, S.; Erdoğan, M.; Ilday, F. Ö. Nonlinear laser lithography for indefinitely large-area nanostructuring with femtosecond pulses. *Nat. Photonics* **2013**, *7*, 897-901.

7. Fuentes-Edfuf, Y.; Garcia-Lechuga, M.; Puerto, D.; Florian, C.; Garcia-Leis, A.; Sanchez-Cortes, S.; Solis, J.; Siegel, J. Coherent scatter-controlled phase-change grating structures in silicon using femtosecond laser pulses. *Sci. Rep.* **2017**, *7*, 4594.
